# Supplementary material for: Harvesting red fluorescence through design specific tuning of ICT and ESIPT: an efficient optical detection of cysteine and live cell imaging
Source: Royal Society of Chemistry journal article supplement (doi:10.1039/c6ra18093k), 2016-01-01
Supplement: c6ra18093k1.pdf [file c6ra18093k1.pdf]

## Supporting Information

### **Harvesting red fluorescence through design specific tuning of ICT and ESIPT: An efficient optical detection of cysteine and live cell imaging**

Uzra Diwan<sup>a</sup>, Virendra Kumar<sup>a</sup>, Rakesh K. Mishra<sup>b</sup>, Nishant Rana<sup>c</sup>, Biplob Koch<sup>c</sup> and K. K. Upadhyay<sup>\*a</sup>

<sup>a</sup>Department of Chemistry (Centre of Advanced Study), Institute of Science, Banaras Hindu University, Varanasi-221005, India.

<sup>b</sup>Photosciences and Photonics Section, Chemical Sciences and Technology Division, CSIR–National Institute for Interdisciplinary Science and Technology, Thiruvananthapuram-695019, India.

<sup>c</sup>Department of Zoology (Centre of Advanced Study), Institute of Science, Banaras Hindu University, Varanasi-221005, India.

*\*E-mail: [drkaushalbhu@yahoo.co.in](mailto:drkaushalbhu@yahoo.co.in); [kku@bhu.ac.in](mailto:kku@bhu.ac.in), Tel: +91 542 670 2488*

| <b>Figures/Tables</b> | <b>Captions</b>                                                                                                     | <b>Pages</b> |
|-----------------------|---------------------------------------------------------------------------------------------------------------------|--------------|
| <b>Fig. S1</b>        | Effect of solvent polarity on absorption and emission spectrum of R1                                                | <b>S3</b>    |
| <b>Fig. S2</b>        | Naked eye colour changes of R1 towards different anions and neutral analytes in of H <sub>2</sub> O: ACN (7:3, v/v) | <b>S4</b>    |
| <b>Fig. S3</b>        | Detection limit and calibration curves for R1 with Cys from UV-visible titration data                               | <b>S5</b>    |
| <b>Fig. S4</b>        | Non-linear curve fitting for R1 with Cys from UV-visible titration data                                             | <b>S6</b>    |
| <b>Fig. S5</b>        | Fluorescence response of R1 in the presence of different analytes under the UV lamp                                 | <b>S7</b>    |
| <b>Fig. S6</b>        | Non-linear curve fitting for R1 with Cys from fluorescence titration data                                           | <b>S8</b>    |
| <b>Fig. S7</b>        | Detection limit and calibration curves for R1 with Cys from fluorescence titration data                             | <b>S9</b>    |
| <b>Fig. S8</b>        | UV-vis. absorption spectrum of R1 towards different anions                                                          | <b>S10</b>   |
| <b>Fig. S9</b>        | Emission spectrum of R1 in the presence of different anions                                                         | <b>S11</b>   |
| <b>Fig. S10</b>       | A plausible mechanism for selective response of R1 towards Cysteine                                                 | <b>S12</b>   |
| <b>Fig. S11</b>       | HRMS spectrum of R1-Cys                                                                                             | <b>S13</b>   |
| <b>Fig. S12</b>       | Optimized structure R1 and R1-Cys                                                                                   | <b>S14</b>   |
| <b>Fig. S13</b>       | Cytotoxicity profile of R1 on HeLa cells after 24 hr treatment                                                      | <b>S15</b>   |
| <b>Fig. S14</b>       | <sup>1</sup> H NMR spectrum of R1                                                                                   | <b>S16</b>   |
| <b>Fig. S15</b>       | <sup>13</sup> C NMR spectrum of R1                                                                                  | <b>S17</b>   |
| <b>Fig. S16</b>       | IR spectrum of R1                                                                                                   | <b>S18</b>   |
| <b>Fig. S17</b>       | Mass spectrum of R1                                                                                                 | <b>S19</b>   |
| <b>Figure S18</b>     | <sup>1</sup> H- <sup>1</sup> H COSY spectrum of R1                                                                  | <b>S20</b>   |
| <b>Table S1</b>       | Comparison of Fluorescent ES IPT Probes for Cysteine based on HBT derivative                                        | <b>S21</b>   |

**Figure S1:** Effect of solvent polarity on absorption and emission spectrum of **R1**

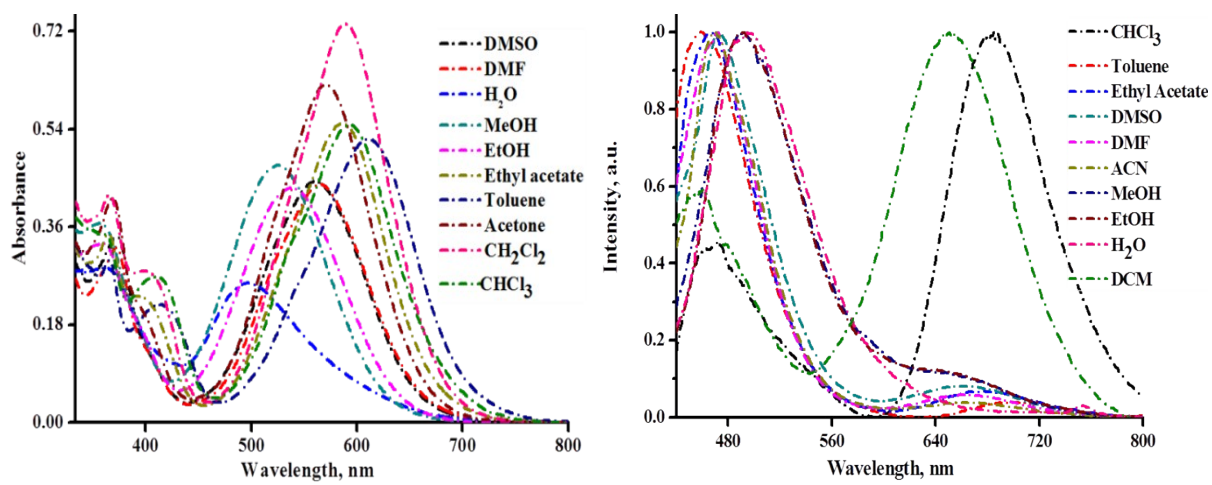

**Figure S2:** Naked eye colour changes of R1 ( $10\mu\text{ M}$ ) towards different anions and neutral analytes in of  $\text{H}_2\text{O}:\text{ACN}$  (7:3, v/v)

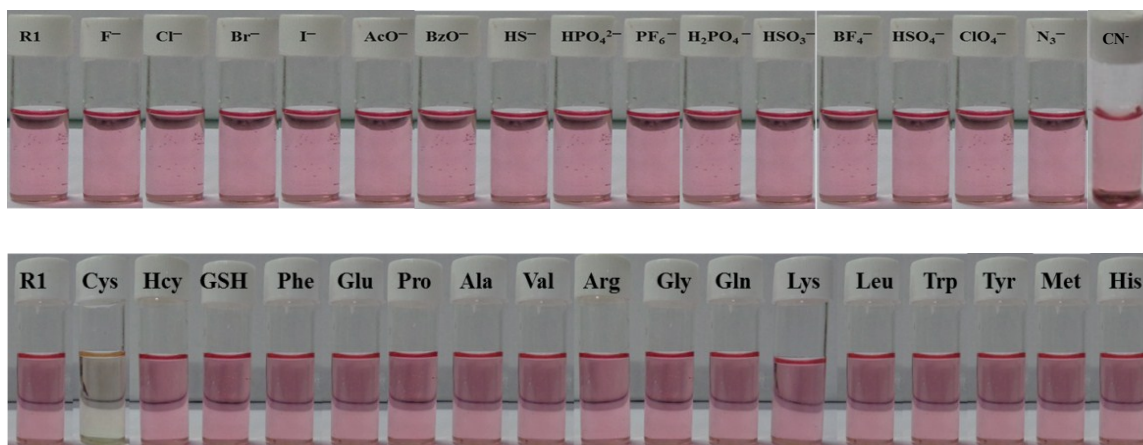

**Figure S3:** Detection limit and calibration curves for **R1** with Cys from UV-visible titration data

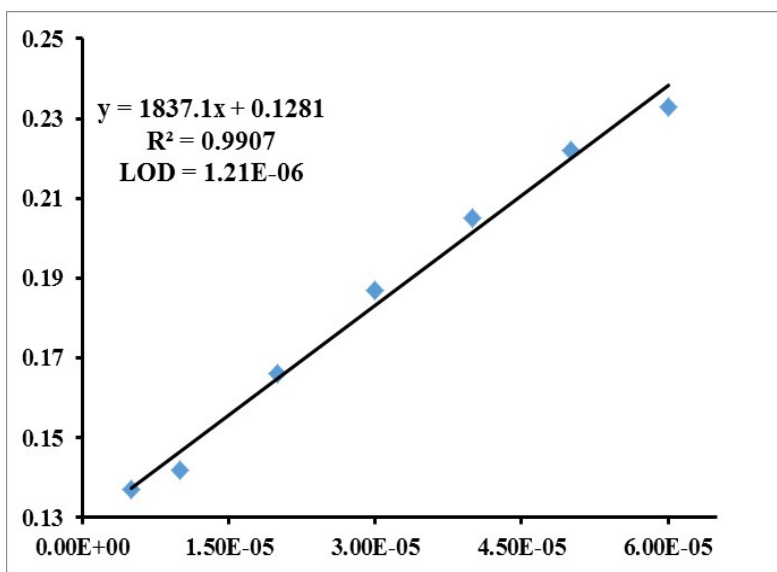

**Figure S4:** Non-linear curve fitting for **R1** with Cys from UV-visible titration data

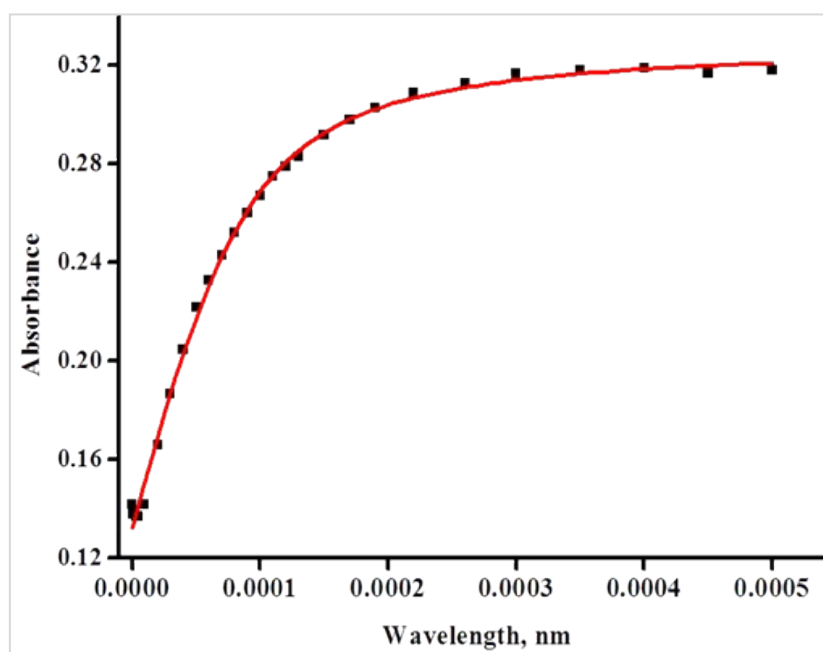

**Figure S5:** Fluorescence response of **R1** in the presence of different analytes under the UV lamp

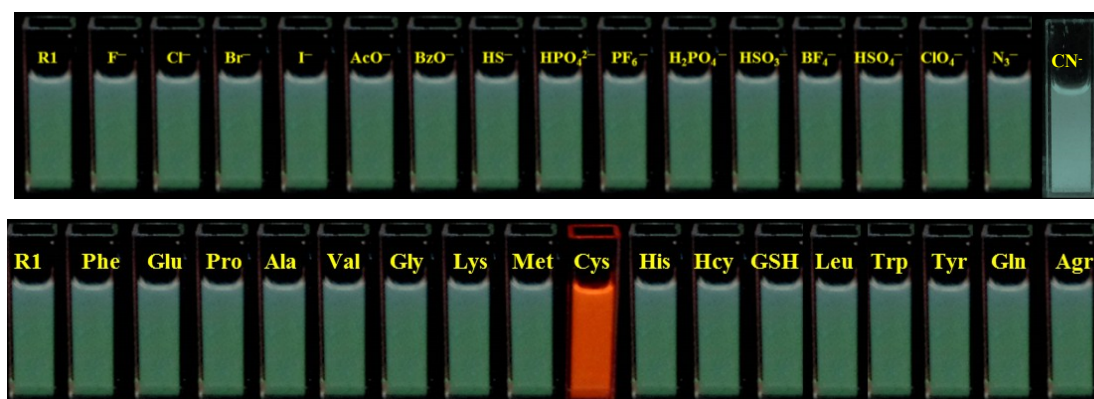

**Figure S6:** Non-linear curve fitting for **R1** with Cys from fluorescence titration data

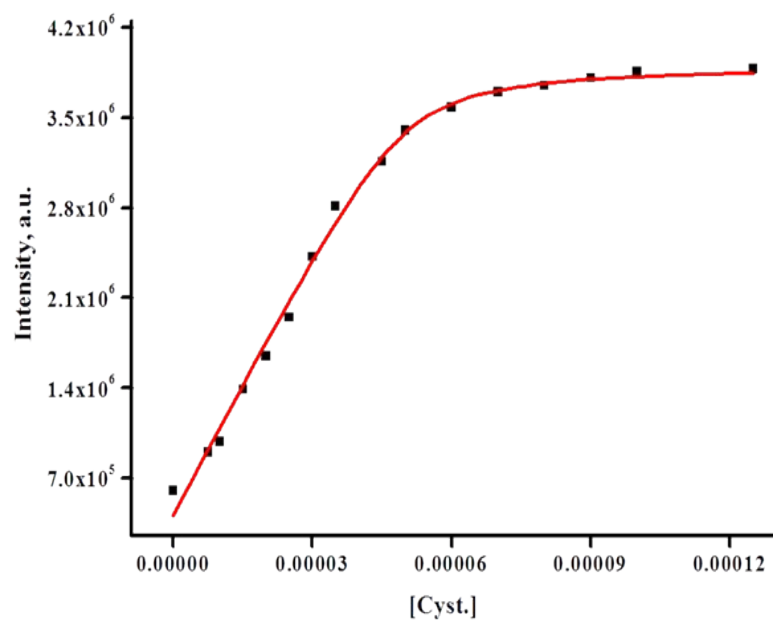



**Figure S7:** Detection limit and calibration curves for **R1** with Cys from fluorescence titration data

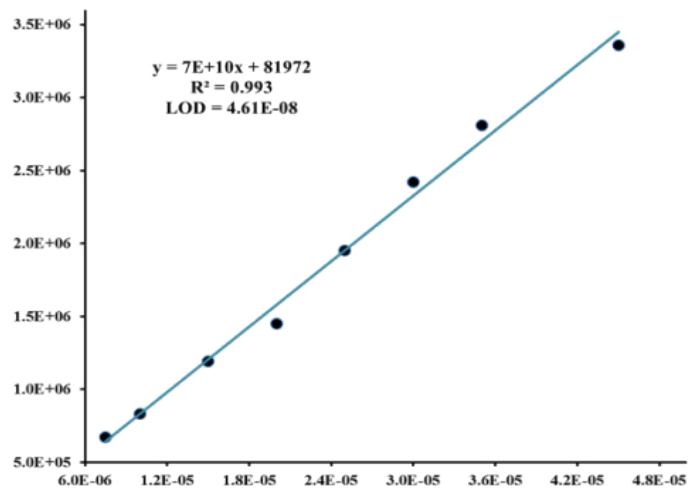

**Figure S8:** UV-vis. absorption spectrum of **R1** towards different anions

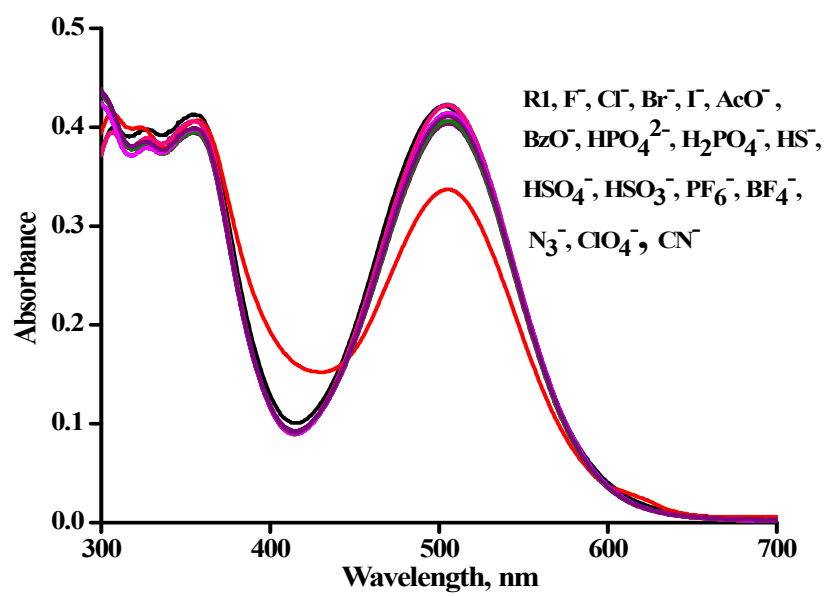

**Figure S9:** Emission spectrum of **R1** in the presence of different anions

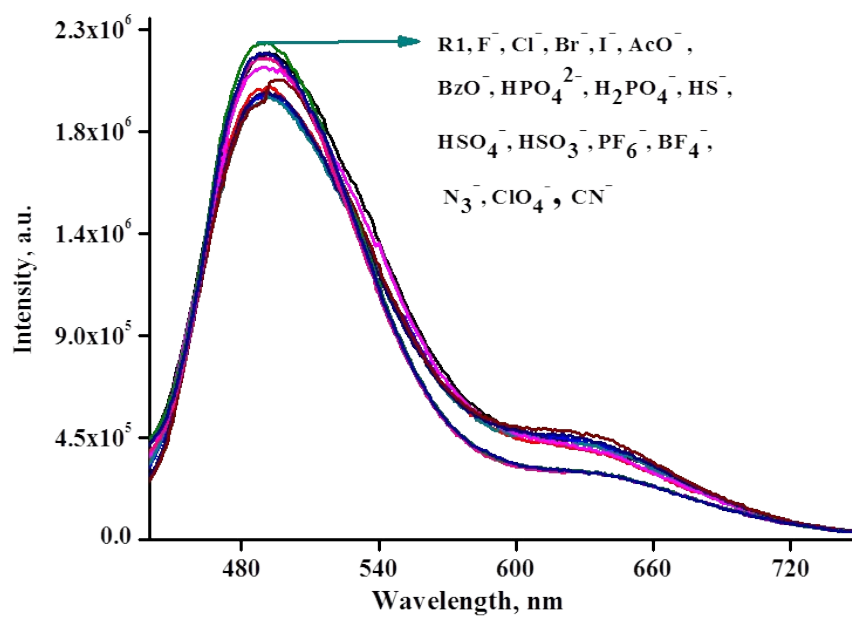

**Figure S10:** A plausible mechanism for selective response of R1 towards Cysteine

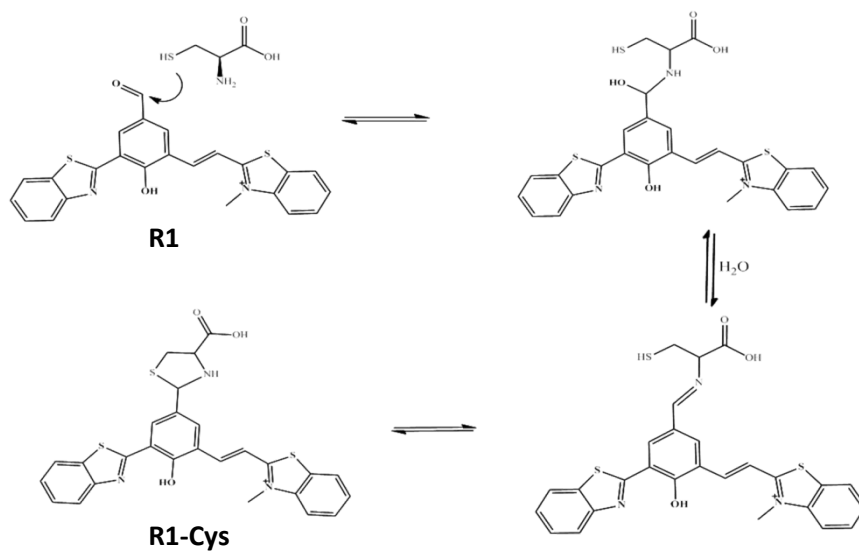

**Figure S11: HRMS spectrum of R1-Cys**

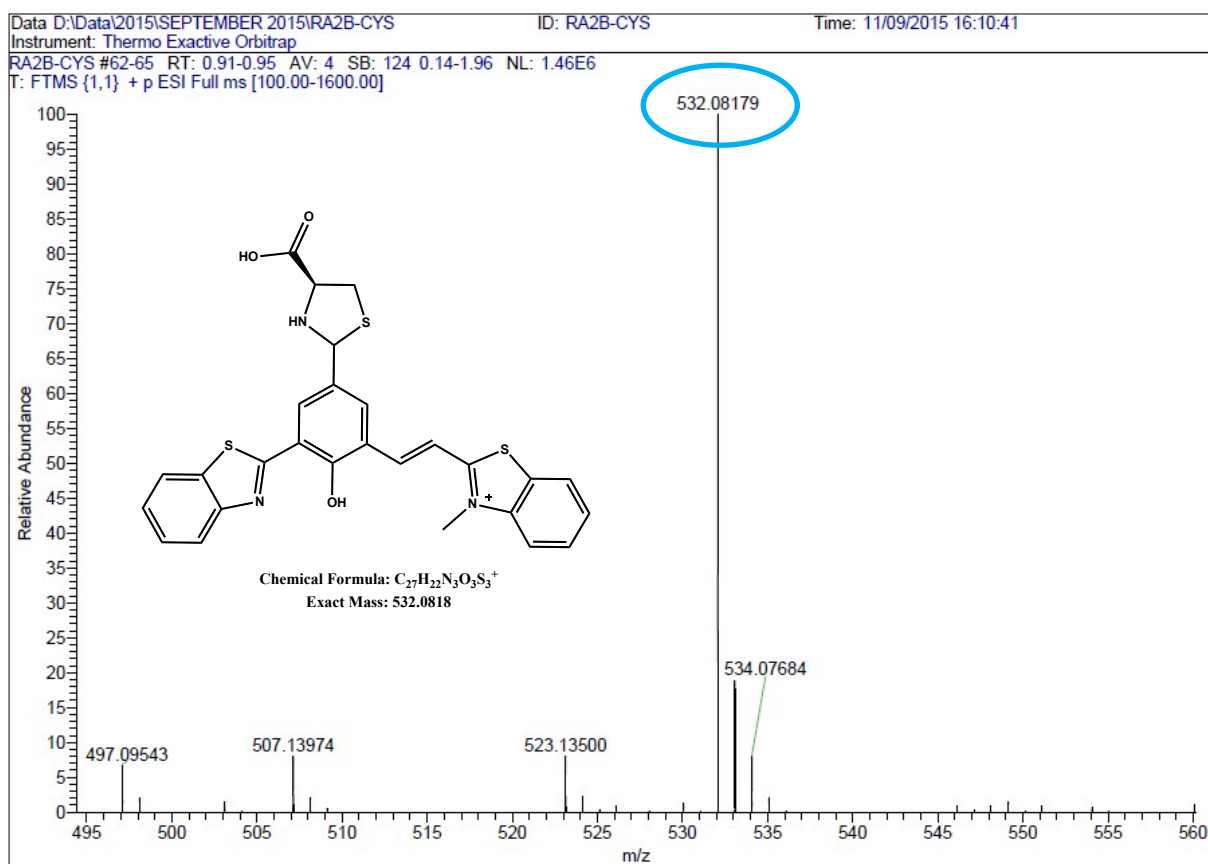

**Figure S12:** Optimised structure of **R1** and **R1-Cys**

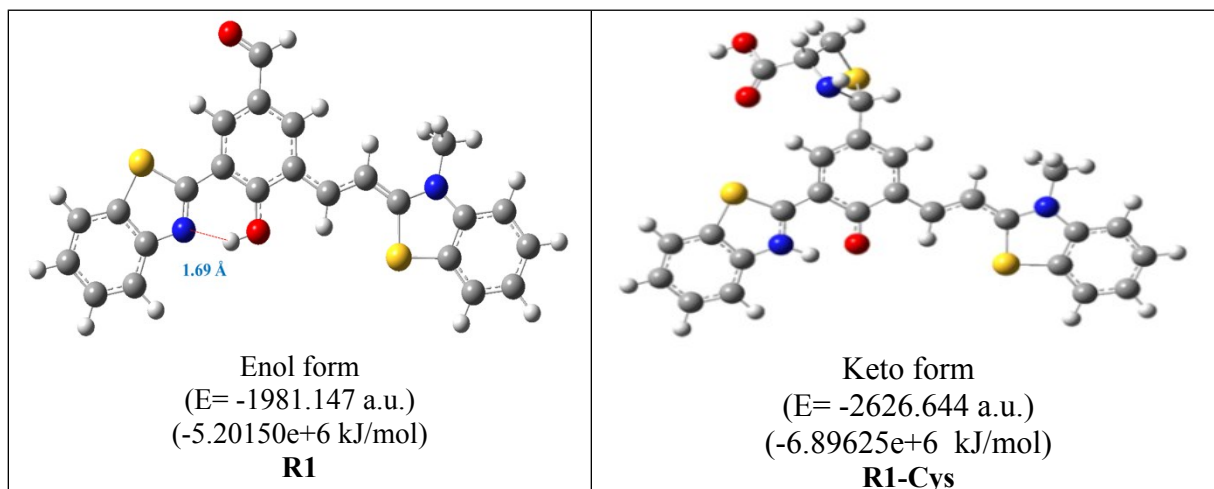

**Figure S13.** Cytotoxicity profile of R1 on HeLa cells after 24 hr treatment

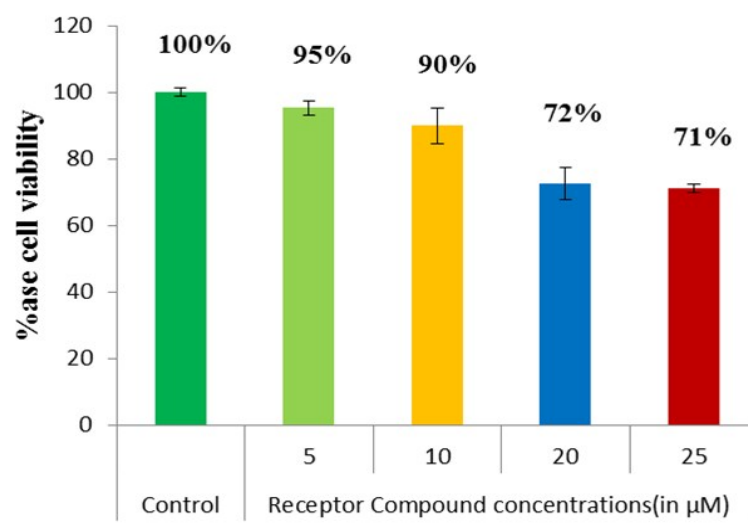

Figure S14: <sup>1</sup>H NMR spectrum of R1

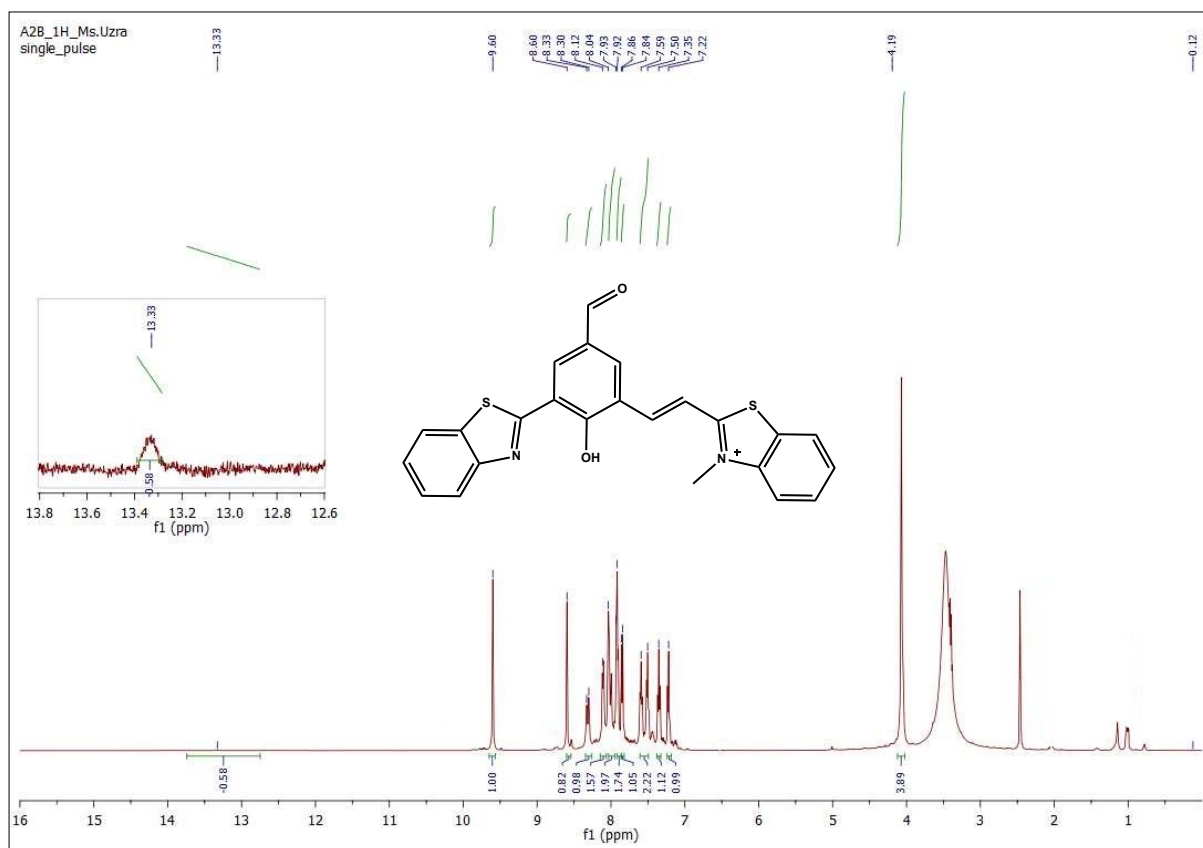



Figure S15: <sup>13</sup>C NMR spectrum of R1

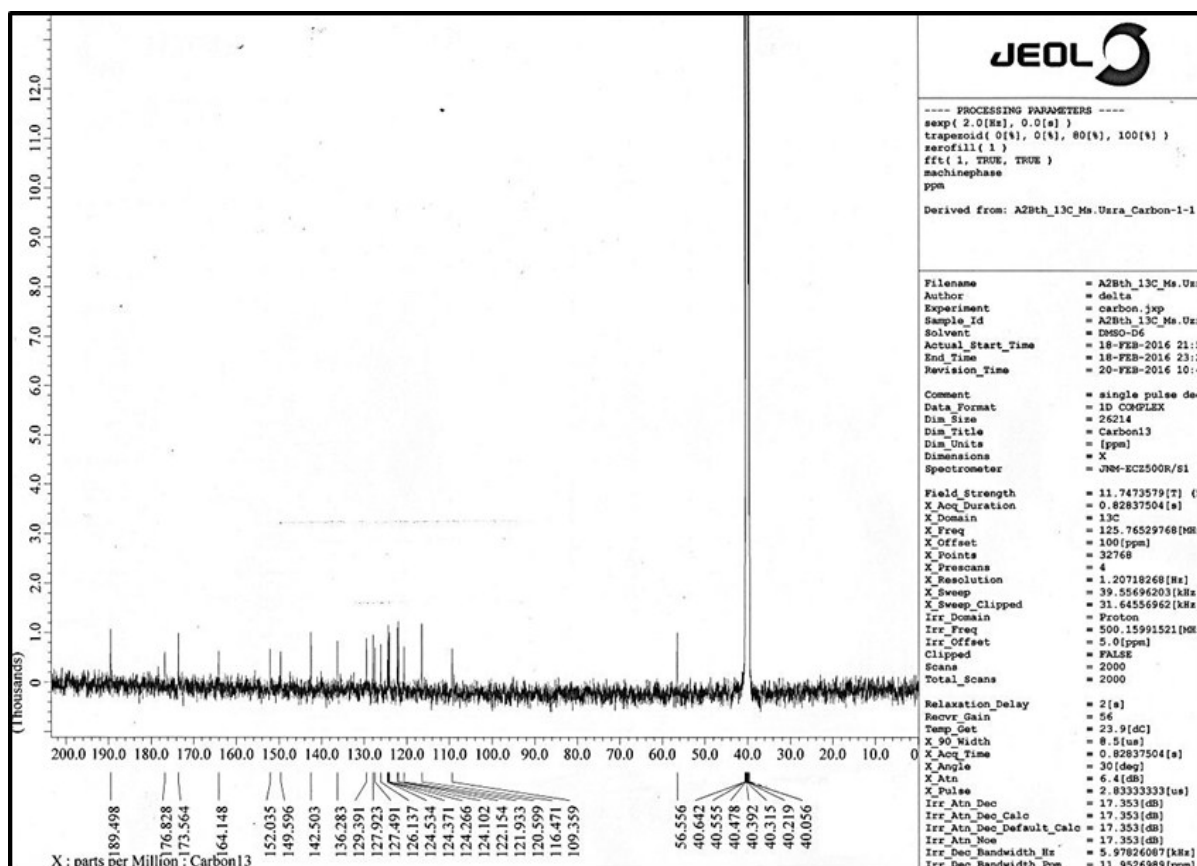

Figure S16: IR spectrum of R1

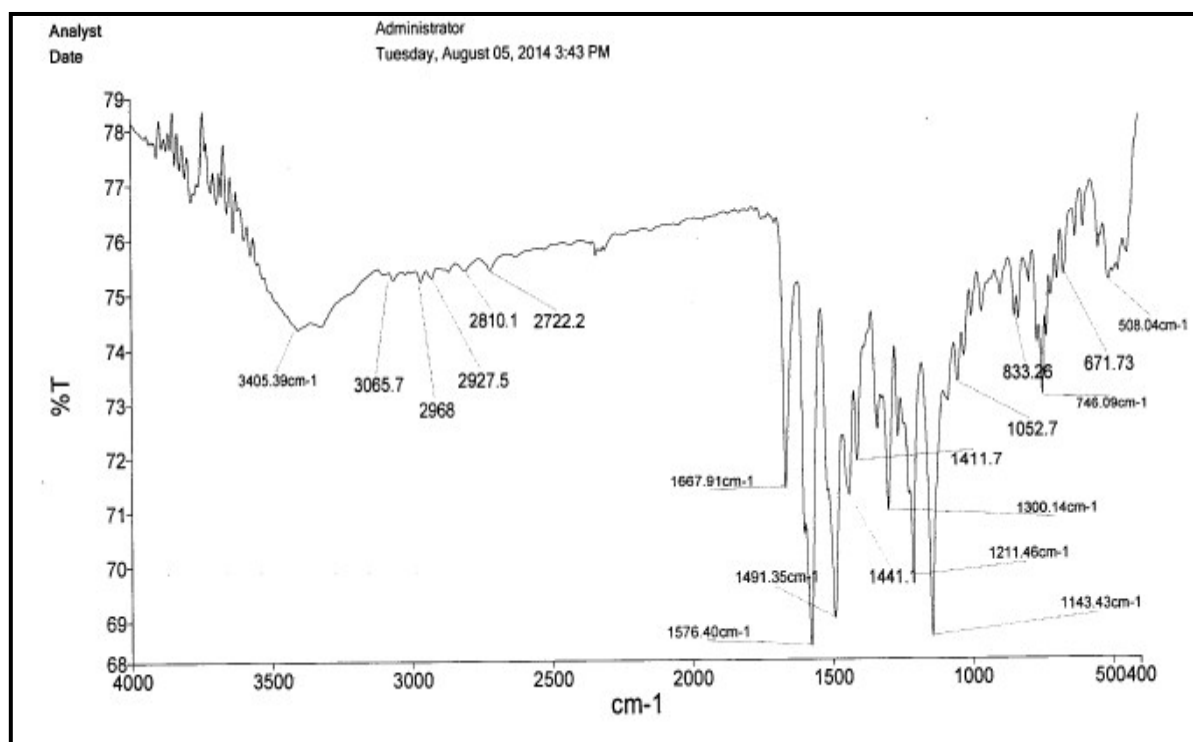

**Figure S17: MASS spectrum of R1**

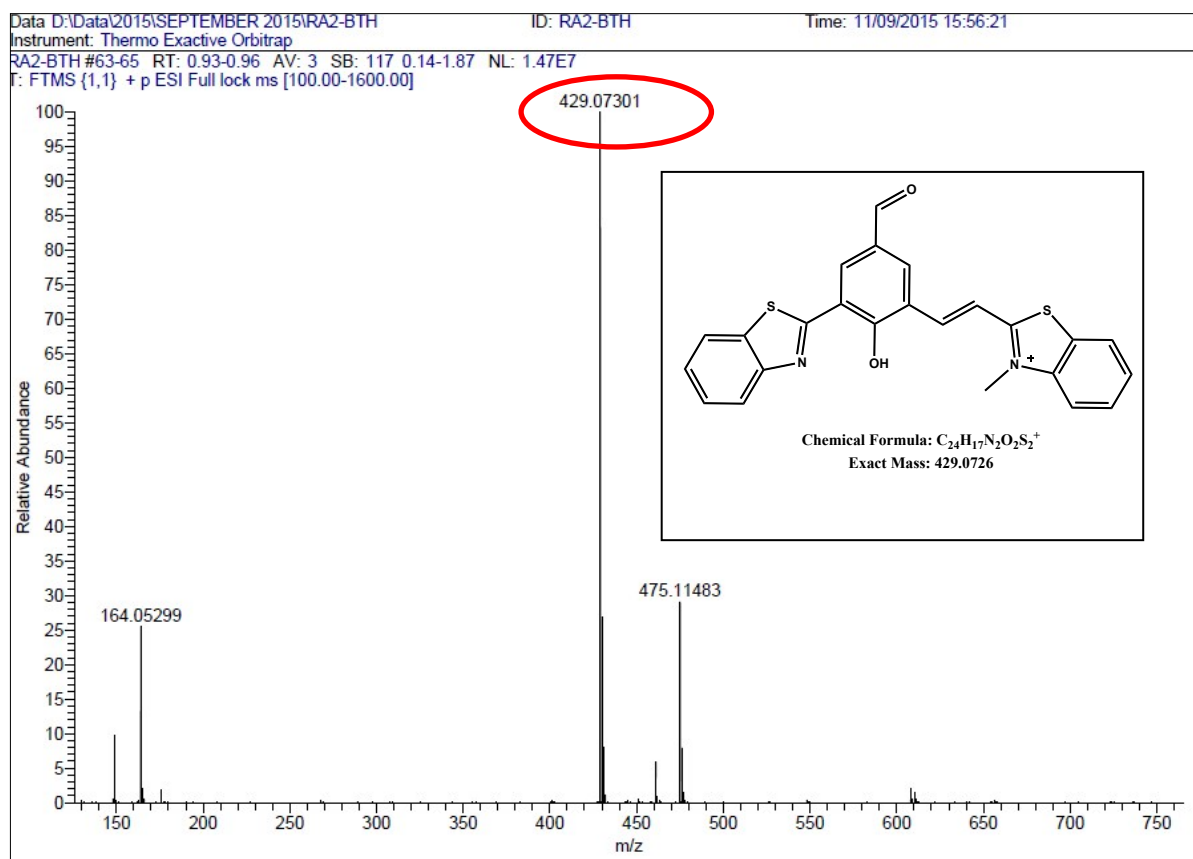

Figure S18:  $^1\text{H}$ - $^1\text{H}$  COSY spectrum of R1

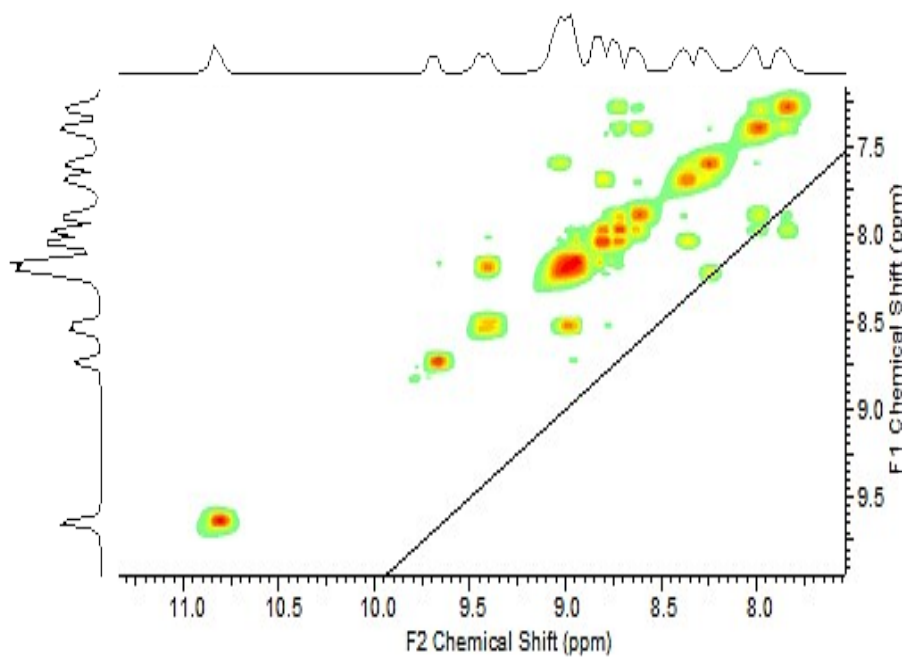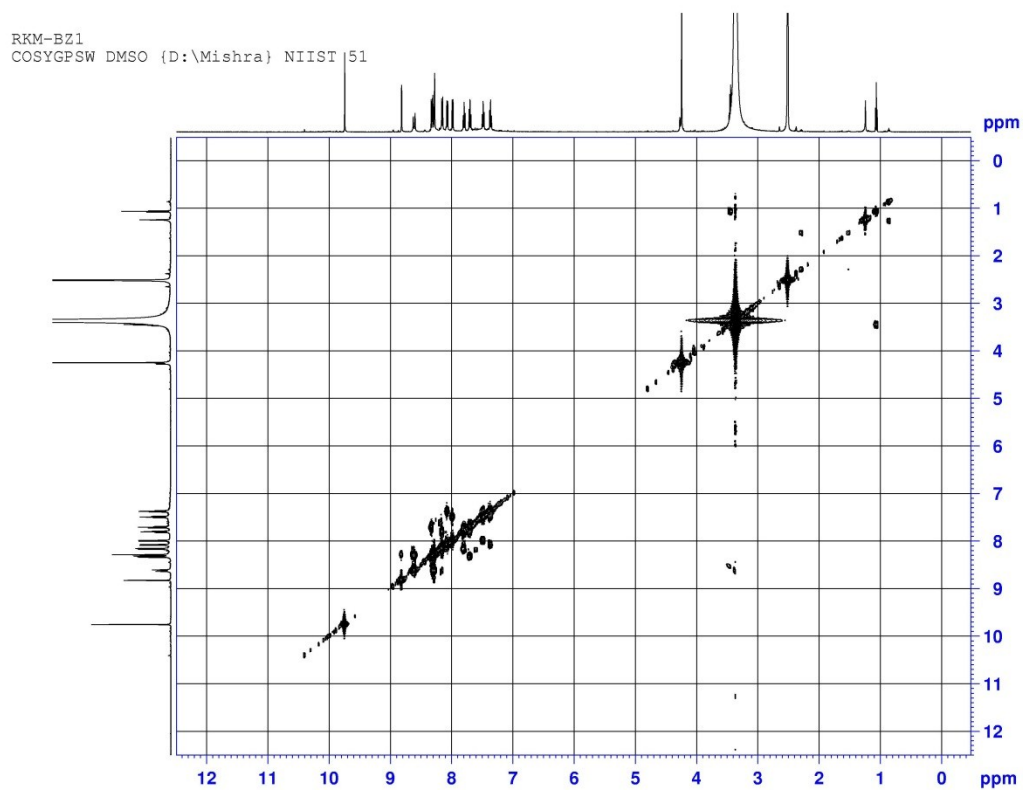

**Table S1:** Comparison of Fluorescent ES IPT Probes for Cysteine based on HBT derivative

| S. No.    | Probes                                                                                              | $\lambda_{ex}$ and ( $\lambda_{em}$ / Keto $\lambda_{em}$ ) of probes in nm | Shift in (Enol $\lambda_{em}$ / Keto $\lambda_{em}$ ) of probes in presence of cysteine | Solvent used for detection                       | Detection limit | Response time    | Interference                                    |
|-----------|-----------------------------------------------------------------------------------------------------|-----------------------------------------------------------------------------|-----------------------------------------------------------------------------------------|--------------------------------------------------|-----------------|------------------|-------------------------------------------------|
| ref 30    | 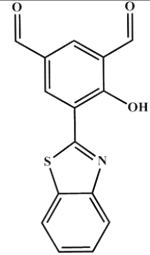                   | 344<br>(436/ 521)                                                           | Enol (436) band decreases while keto. (521) one increases                               | HEPES buffer (at pH 7.4)                         | -----           | ~3 min to 5 min. | HCy                                             |
| ref 31    |                    | 304<br>(377/487)                                                            | Enol (377) band decreases while keto. (487) one increases                               | EtOH/phosphate buffer (20 mM, pH 7.4, 2:8 v/v)]  | 0.11 $\mu$ M    | 9 min.           | HCy                                             |
| ref 32    |                   | 330<br>(380 /467)                                                           | Both the band increases (380 /467)                                                      | DMSO: 10 mM HEPES (v/v 8 : 2)                    | 2.8 $\mu$ M     | 15 min           | GSH                                             |
| ref 33    |                  | 305<br>(rhodol emission at 587 and HBT emission 454)                        | Rhodol emission at 587 decreases while HBT emission at 454 increases                    | DMF/ phosphate buffer (3 : 7 v/v, 20 mM, pH 7.4) | 44 nM           | 5 min For Cys    | Same response for Hcy , red fluorescent for GSH |
| <b>R1</b> | <br>Present Work | 430 nm<br>(492/625)                                                         | Enol. (492) band decreases while keto. (625) one increases                              | ACN/ H <sub>2</sub> O (3:7 v/v)                  | 49 nm           | ~ 1.0 min        | No interference from Hcy/GSH                    |
